# Supplementary material
Source: publisher figshare collection journal article supplement (https://gsajournals.figshare.com/ndownloader/files/25728065)
Supplement: Supplementary file 1 [file 25728065]

## Sheet: Table S2
Liu, Neuenkirchen et al. - Table S2
Table S2. Distribution of GATC sites in the female Drosophila genome
Euchromatin (Eu, female)
	Number of GATC sites	Chromosome length in bp
chrX	64107	22422827
chr2L	60923	23011544
chr2R	61298	21146708
chr3L	67959	24543557
chr3R	74983	27905053
chr4	3675	1351857
Total	332945	120381546
Heterochromatin (Het, female)
	Number of GATC sites	Chromosome length in bp
chrXHet	641	204112
chr2LHet	935	368872
chr2RHet	8249	3288761
chr3LHet	7555	2555491
chr3RHet	7353	2517507
chrU	25452	10049037
Total	50185	18983780
Whole fly (female)
	Number of GATC sites	Chromosome length in bp
Total	383130	139365326
Distribution of GATC sites
	Number of GATC sites per 1,000 bp
Eu	2.77
Het	2.64
Whole fly	2.75
